# Supplementary material
Source: JCI journal article supplement (doi:10.1172/jci173675)

# **Transient inhibition of the Sodium-Glucose Cotransporter 2 early after ischemia/reperfusion injury ameliorates Chronic Kidney Disease in rats .**

Miguel Ángel Martínez-Rojas<sup>1,2</sup>, Hiram Balcázar<sup>1,2</sup>, Isaac González-Soria<sup>1,2</sup>, Jesús  
Manuel González-Rivera<sup>1,2</sup>, Mauricio E. Rodríguez-Vergara<sup>1,2</sup>, Laura A. Velazquez-  
Villegas<sup>3</sup>, Juan Carlos León-Contreras<sup>4</sup>, Rosalba Pérez-Villalva<sup>1,2</sup>, Francisco Correa<sup>5</sup>,  
Florencia Rosetti<sup>6</sup>, and Norma A. Bobadilla<sup>1,2</sup>

**Supplemental Western Blot Images  
Obtained with the iBright CL1500 Imaging System**

Full unedited gel for Figure 2: AGT

30 ug of kidney cortex homogenates

Primary Rabbit ab213705 Antibody: 1:5000

Anti-Rabbit 1:20,000

Exp 5 seg

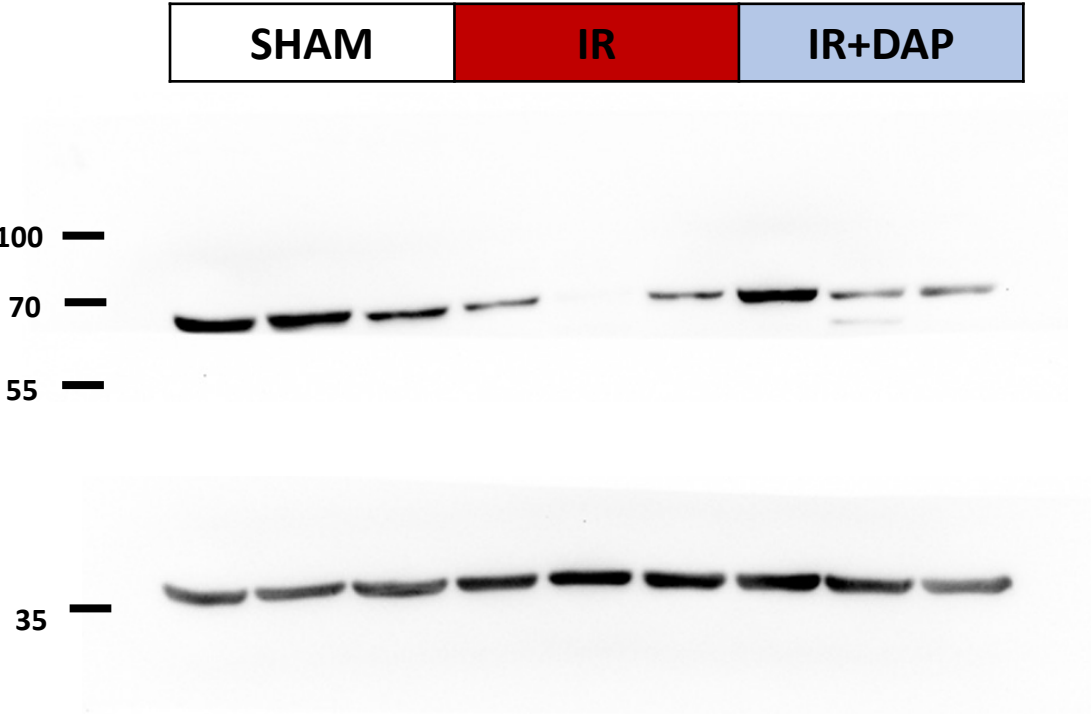

Primary Rabbit GAPDH Antibody: ab181602

1:120,000 Rabbit 1:10,000 Exp 5 s

19/04/23

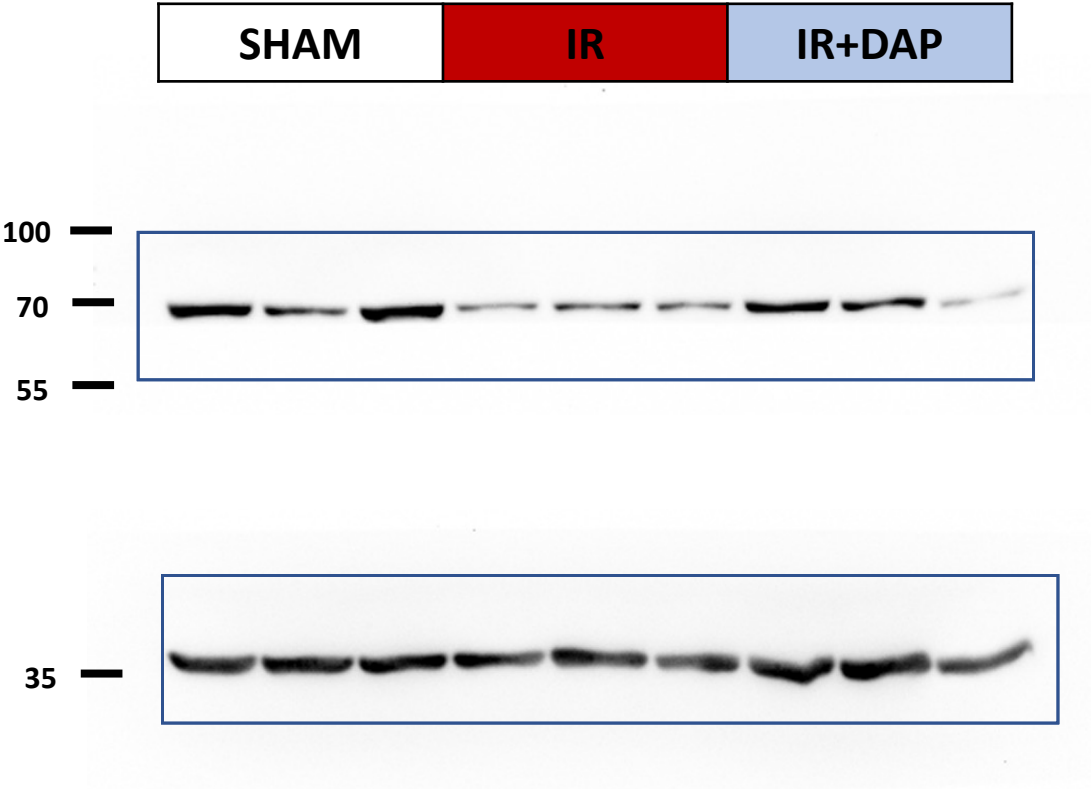

Full unedited gels for Figure 4 and 7: Mitofusin 1 and 2  
20 ug of kidney cortex mitochondria

Primary Mouse Anti-Mfn: 1:2000  
Anti-Mouse ab6789 1:40,000 Exp 10 seg

5 days after AKI

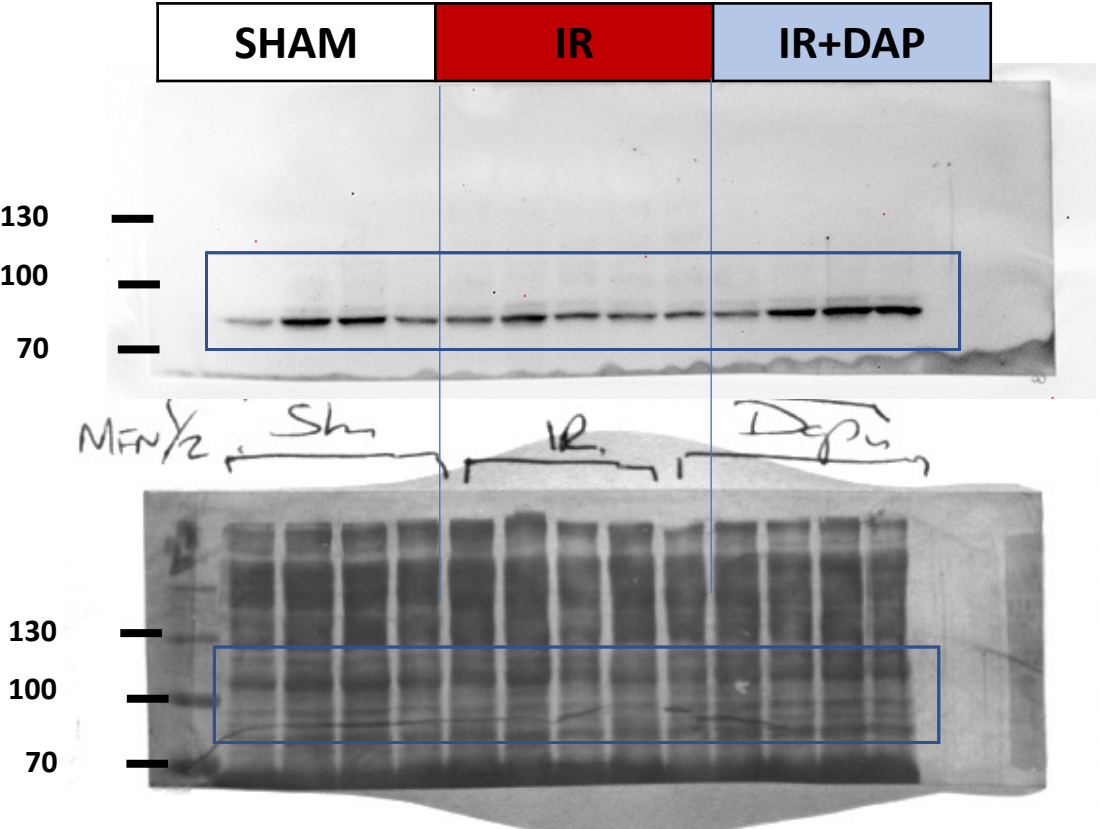

29/11/2023

10 days after AKI

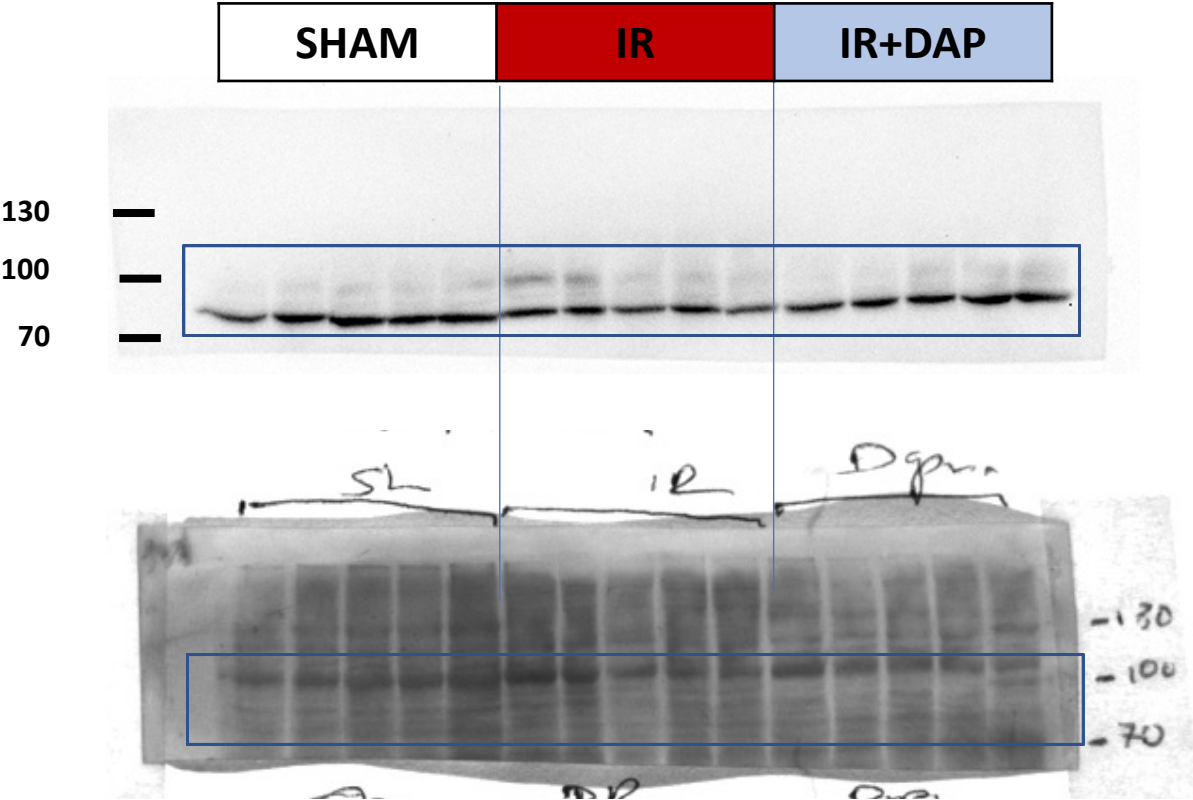

04/01/2024

Full unedited gel for Figure 4 and 7: Drp1  
60 ug of kidney cortex isolated mitochondria

Primary Mouse Anti-Drp1 sc-271583 : 1:500  
Anti-Mouse ab6789 1:40,000 Exp 1 min

5 days after AKI

| SHAM | IR | IR+DAP |
|------|----|--------|
|------|----|--------|

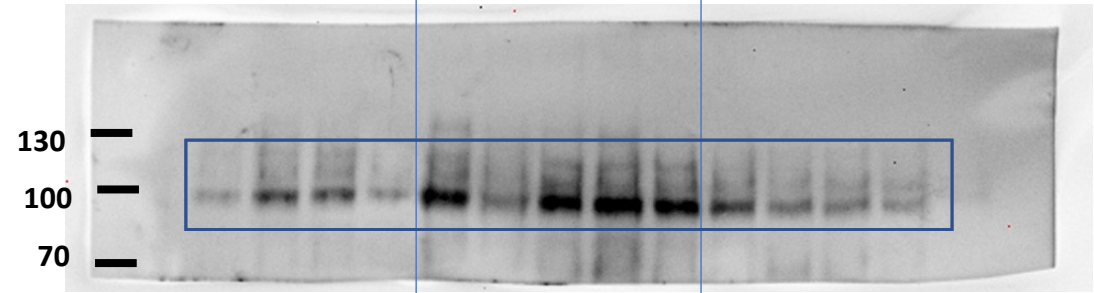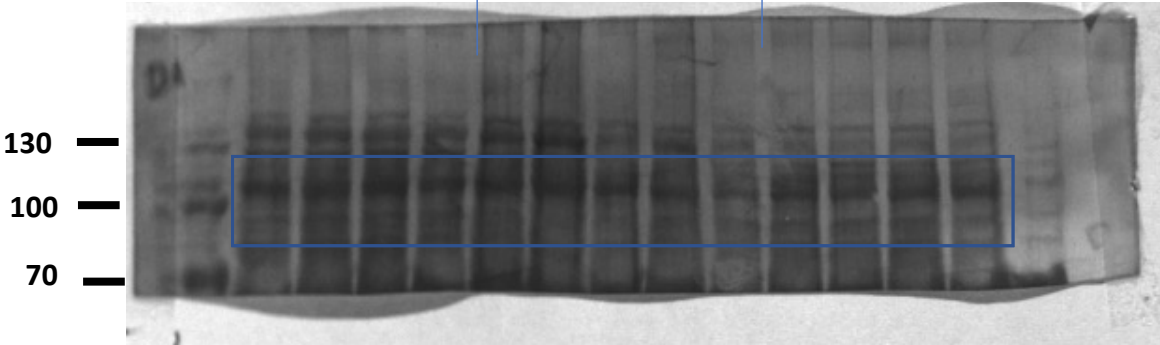

15/12/2023

10 days after AKI

| SHAM | IR | IR+DAP |
|------|----|--------|
|------|----|--------|

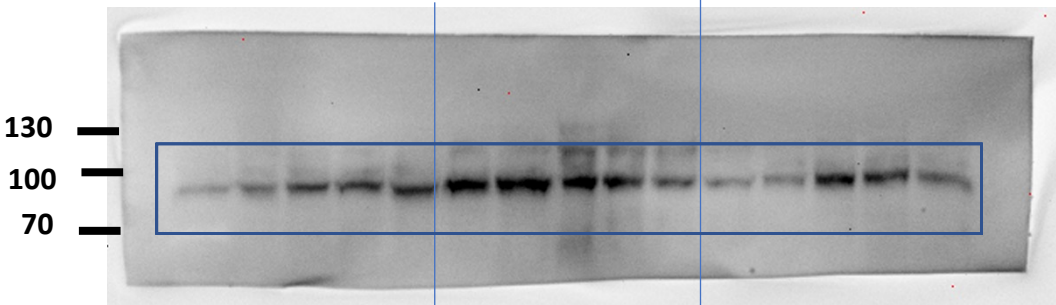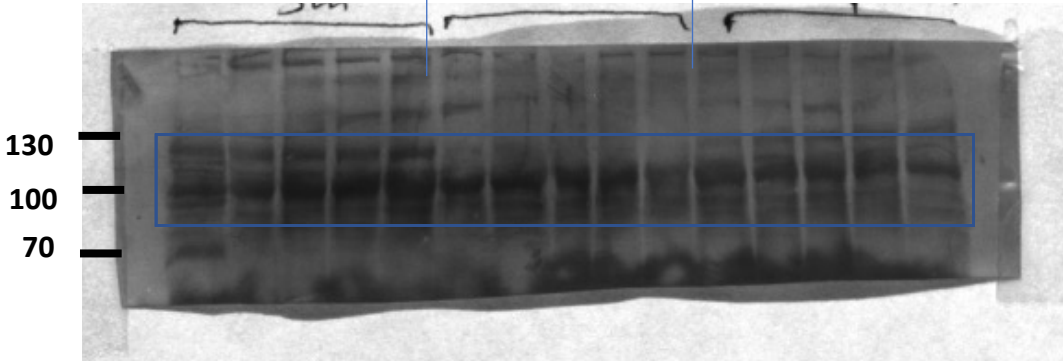

21/12/23

Full unedited gel for Figure 4 and 7: OPA1  
60 ug of kidney cortex isolated mitochondria

Primary Mouse Anti-OPA1 sc-393296: 1:500  
Anti-Mouse ab6789 1:40,000 Exp 30 seg

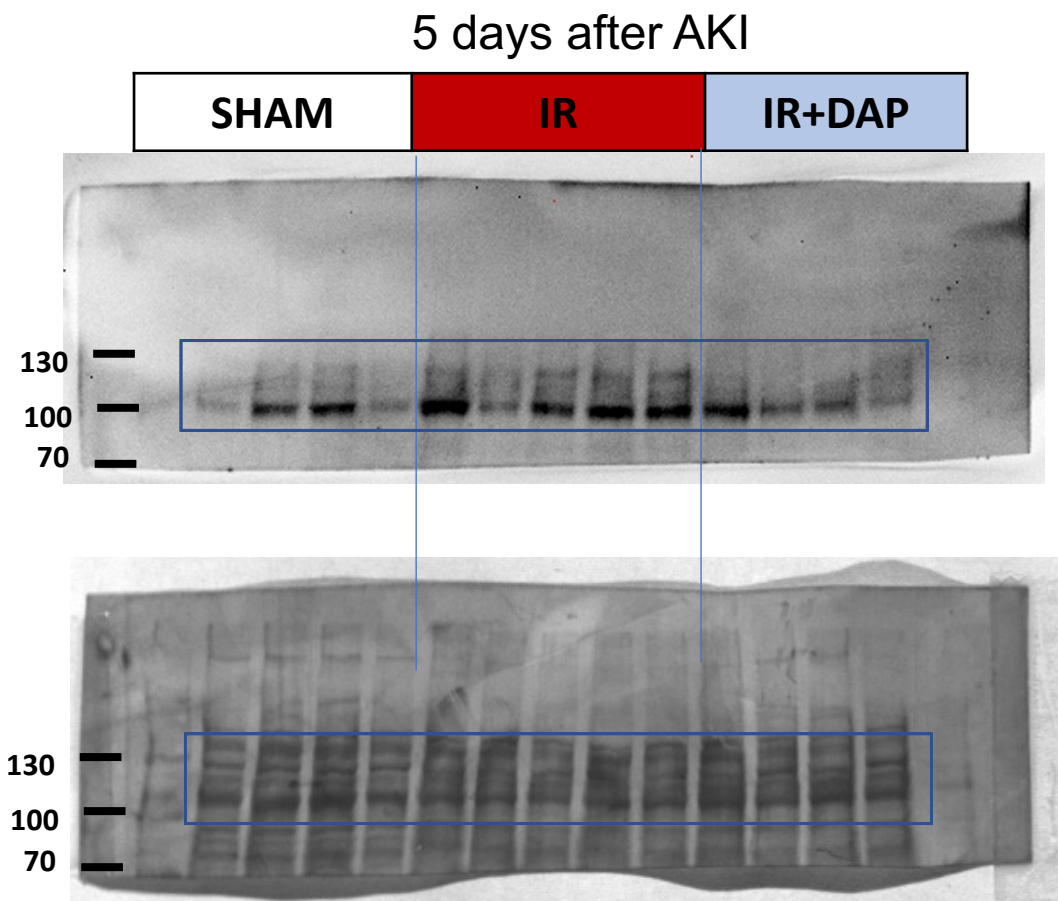

15/12/2023

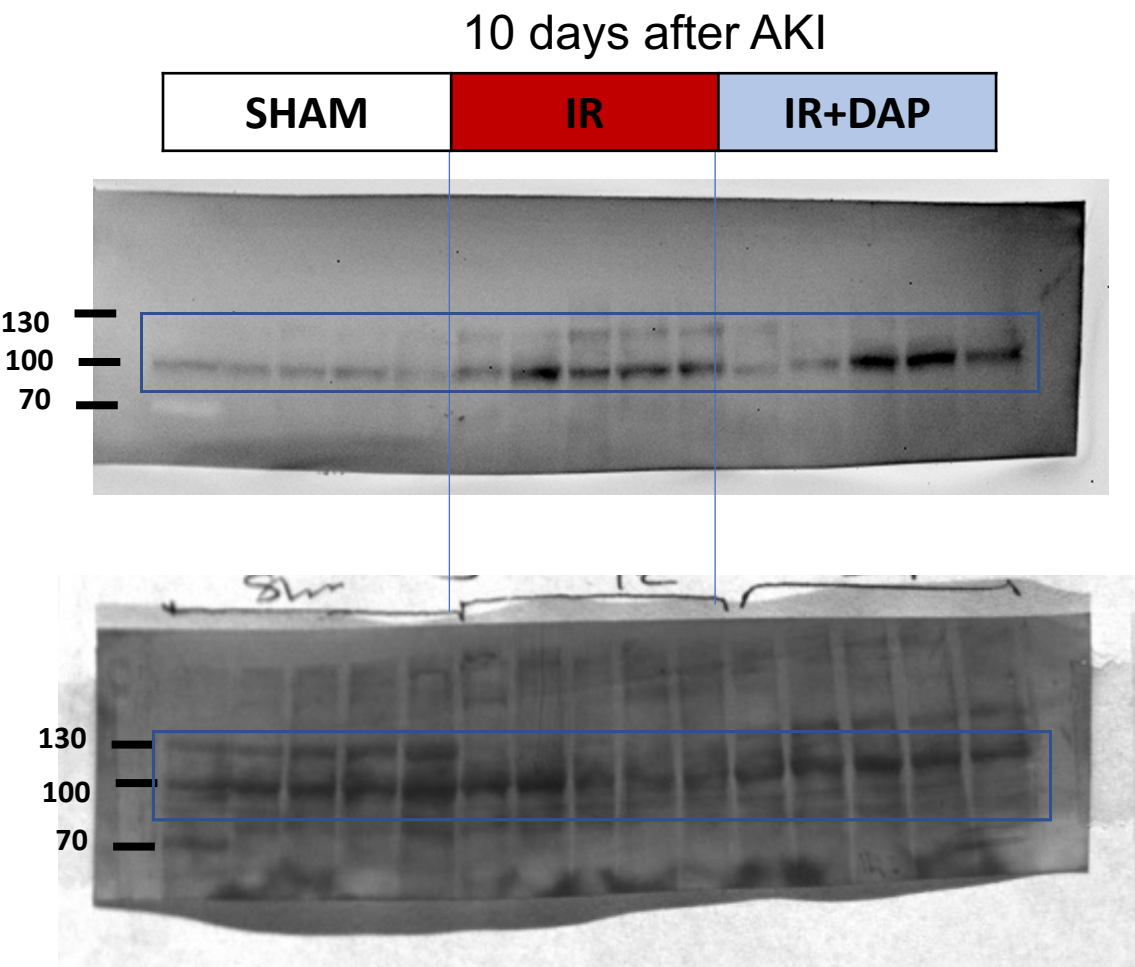

21/12/23

Full unedited gel for Figure 4 and 7: PINK1  
20 ug of kidney cortex isolated mitochondria

Primary Rabbit Anti-PINK1 P0076 1:1000  
Anti-Rabbit 211-032-171 1:15,000 Exp 10 seg

5 days after AKI

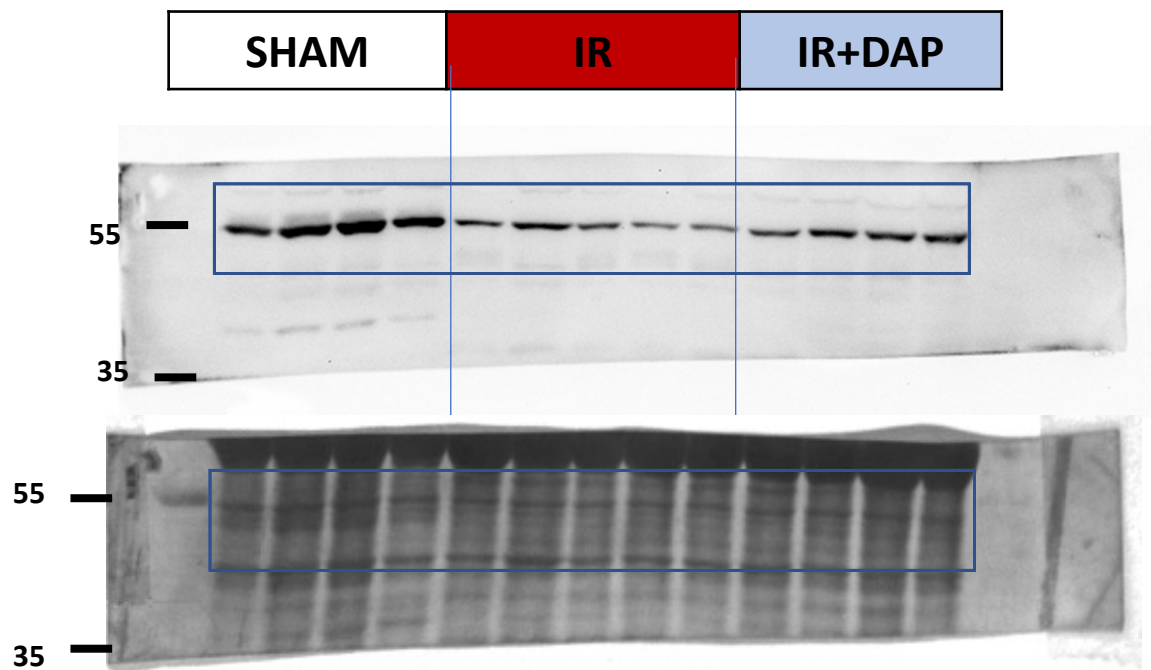

10 days after AKI

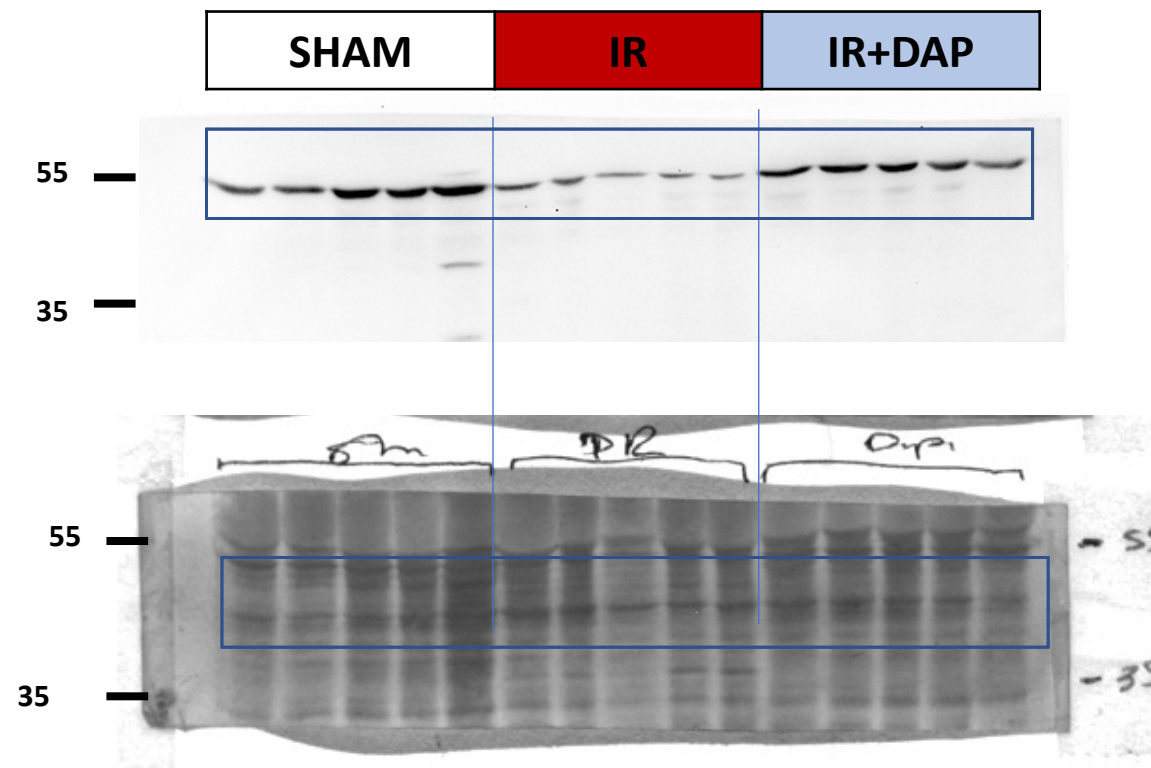



Full unedited gel for Figure 4 and 7: Parkin  
60 ug of kidney cortex isolated mitochondria

Primary Rabbit Anti-Parkin P6248 1:1000  
Anti-Mouse ab6789 1:40,000 Exp 3 min

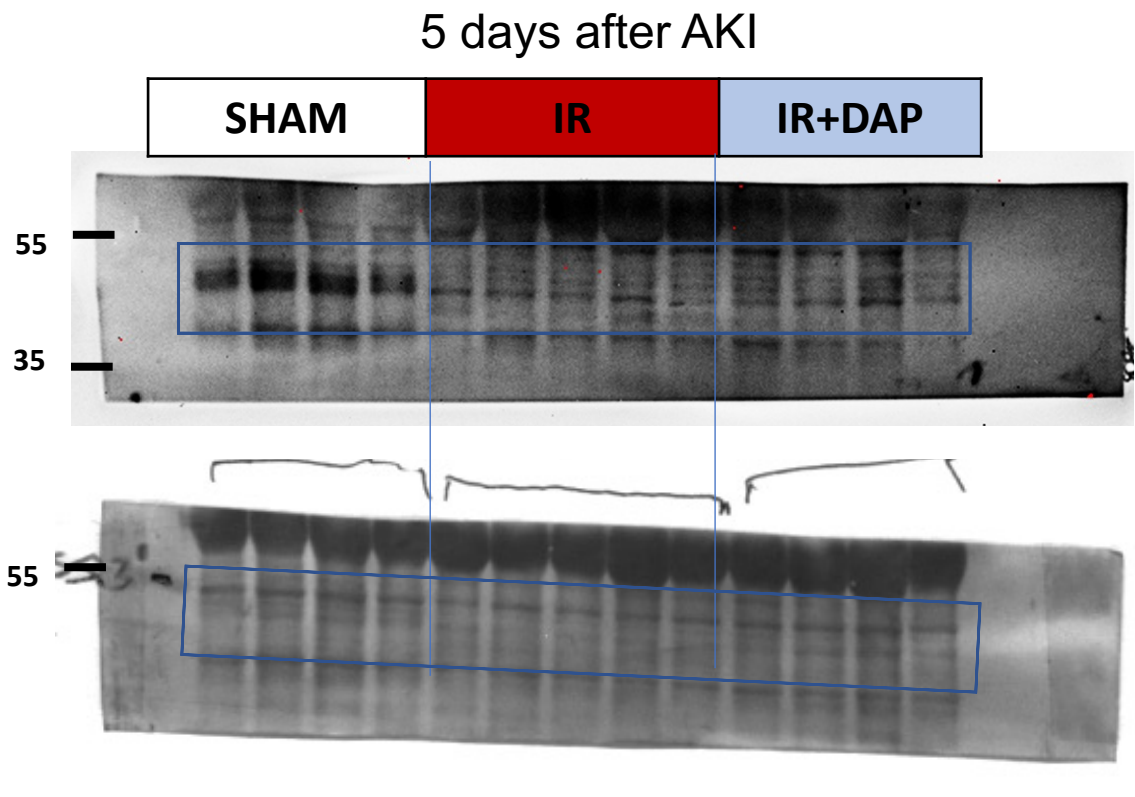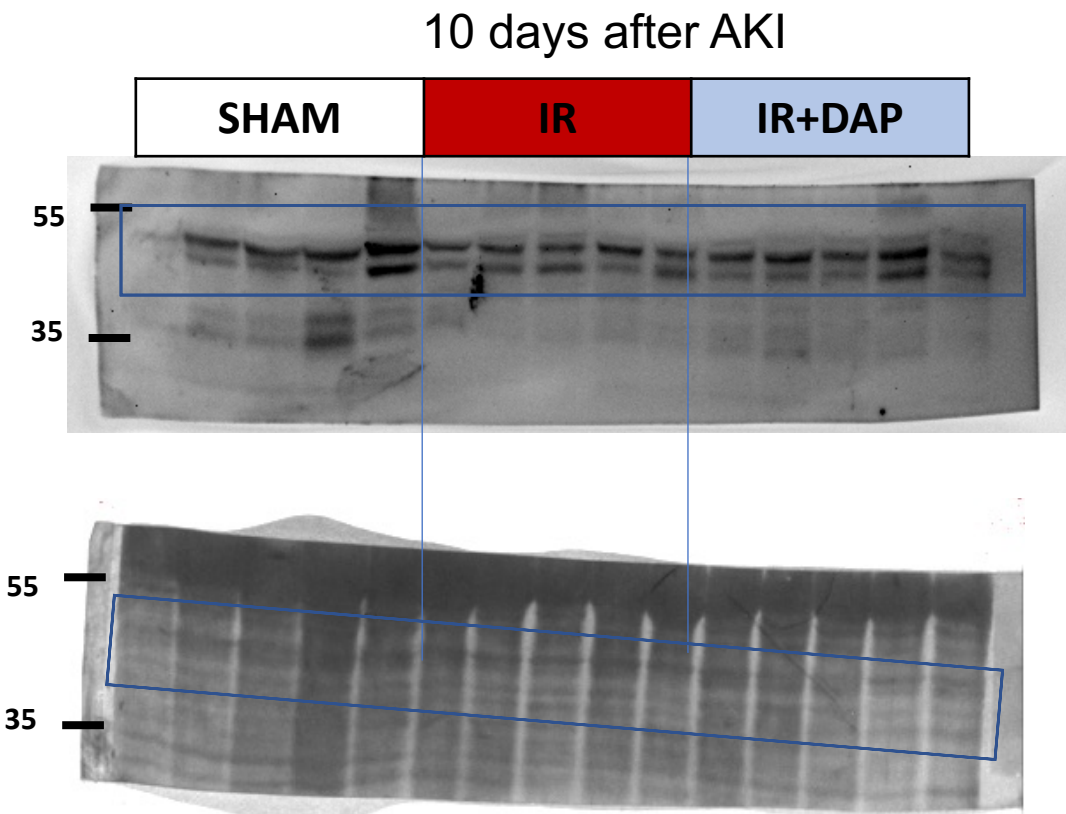

Full unedited gel for Figure 5 and 8: Sirt3  
30 ug of kidney cortex isolated mitochondria  
Primary Mouse Anti-Sirt3 sc-365175 1:1000  
Anti-Mouse ab6789 1:40,000 Exp 1 min

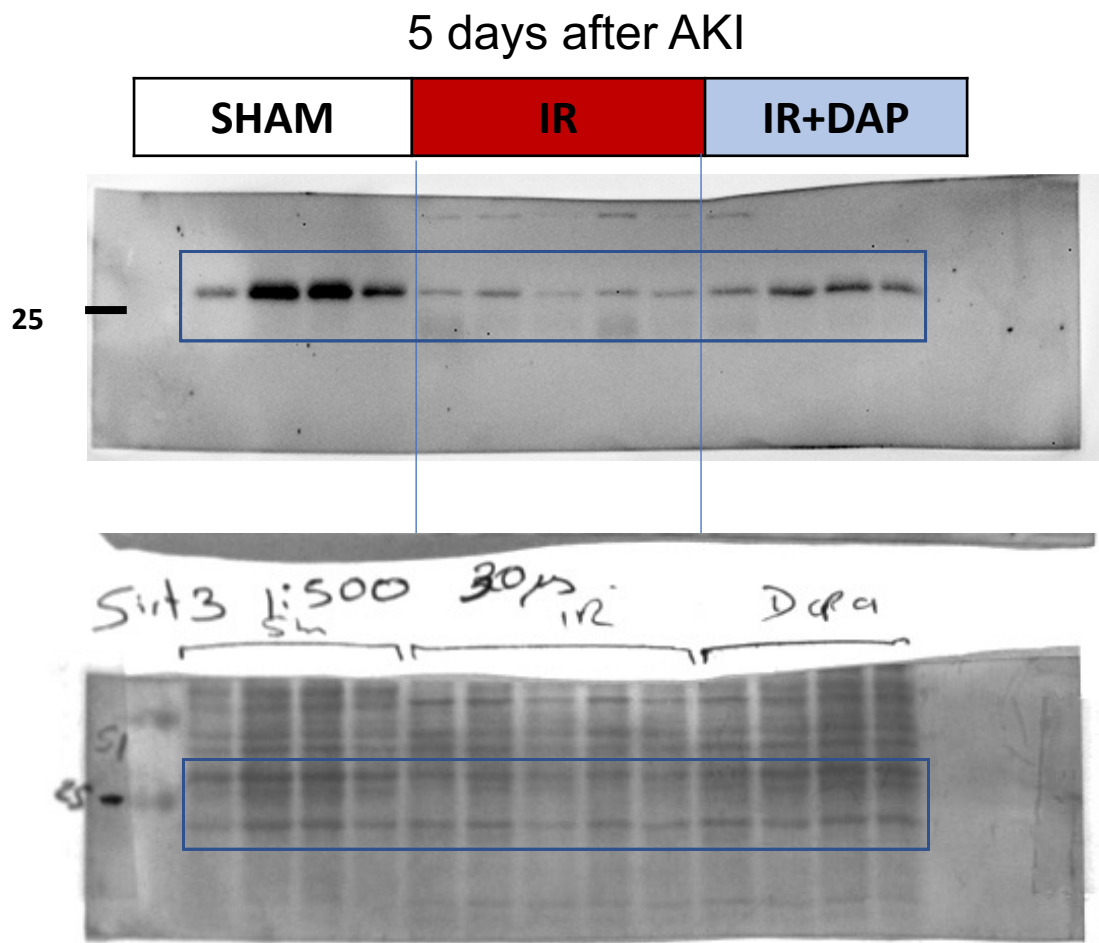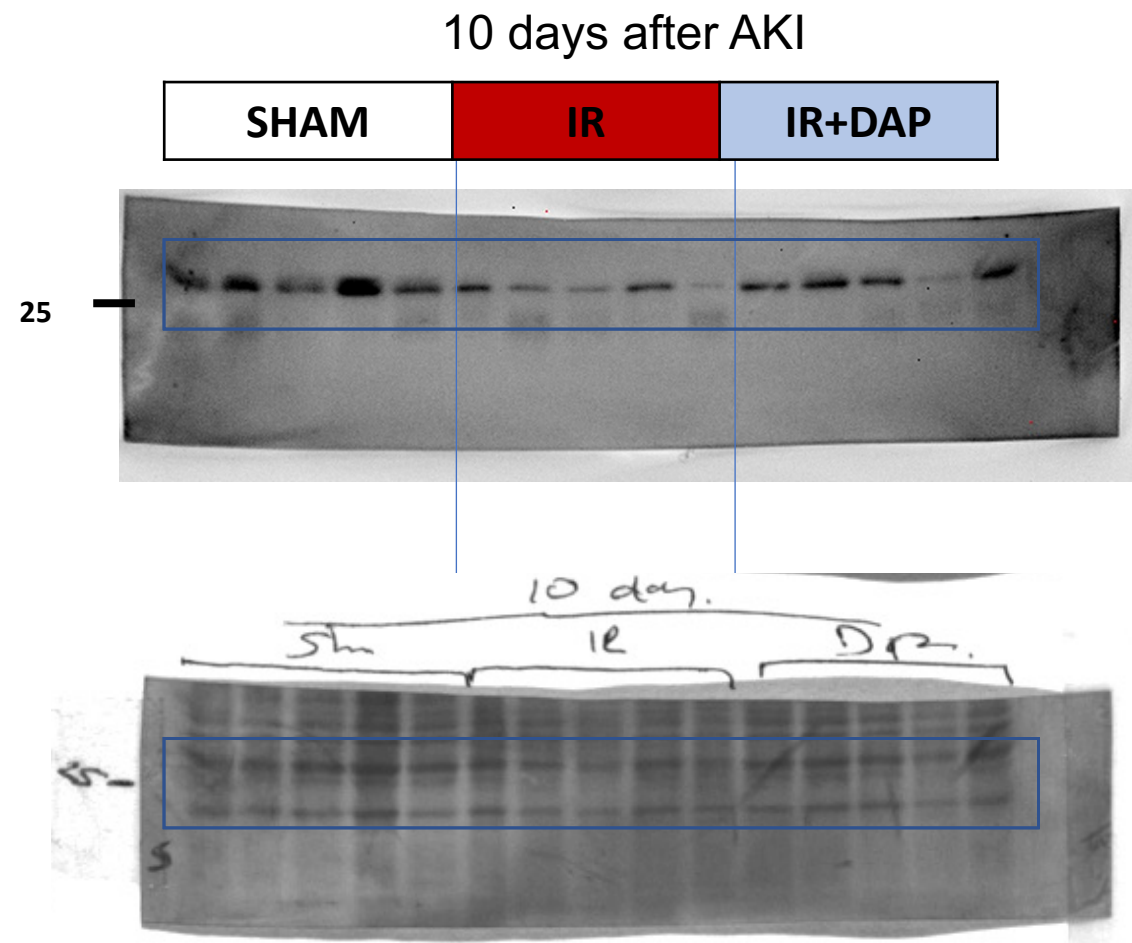



Full unedited gel for Figure 5 and 8: OXPHOS Complex V, III, I

20 ug of kidney cortex mitochondria

Primary Mouse Anti-OXPHOS ab110413: 1:20,000

Anti-Mouse ab6789 1:40,000 Exp 1 min

10 days after AKI

5 days after AKI

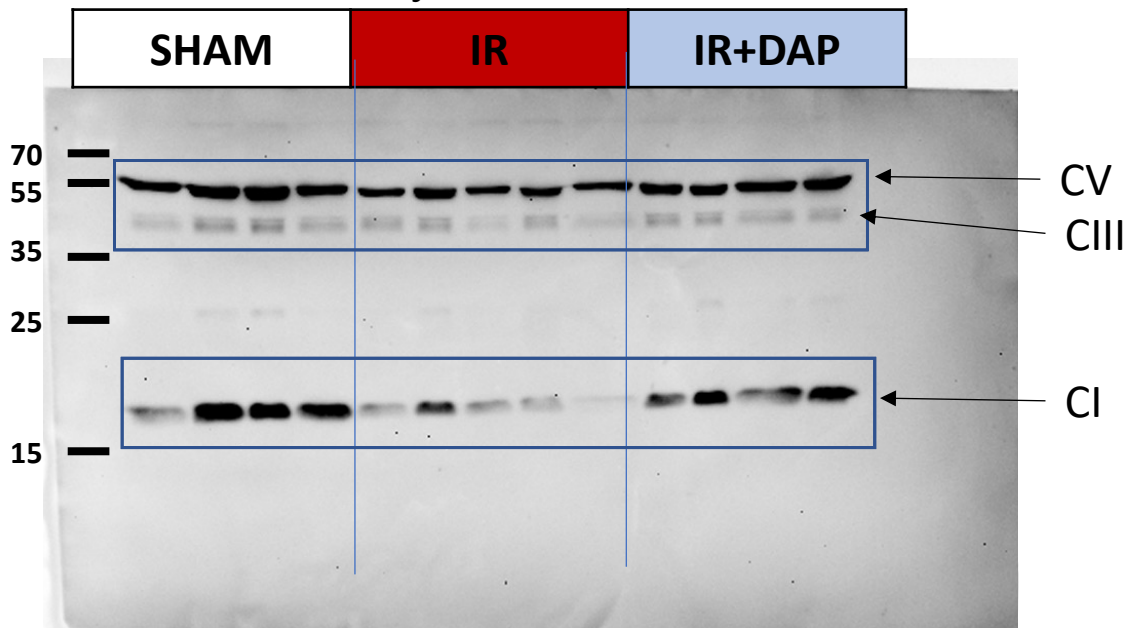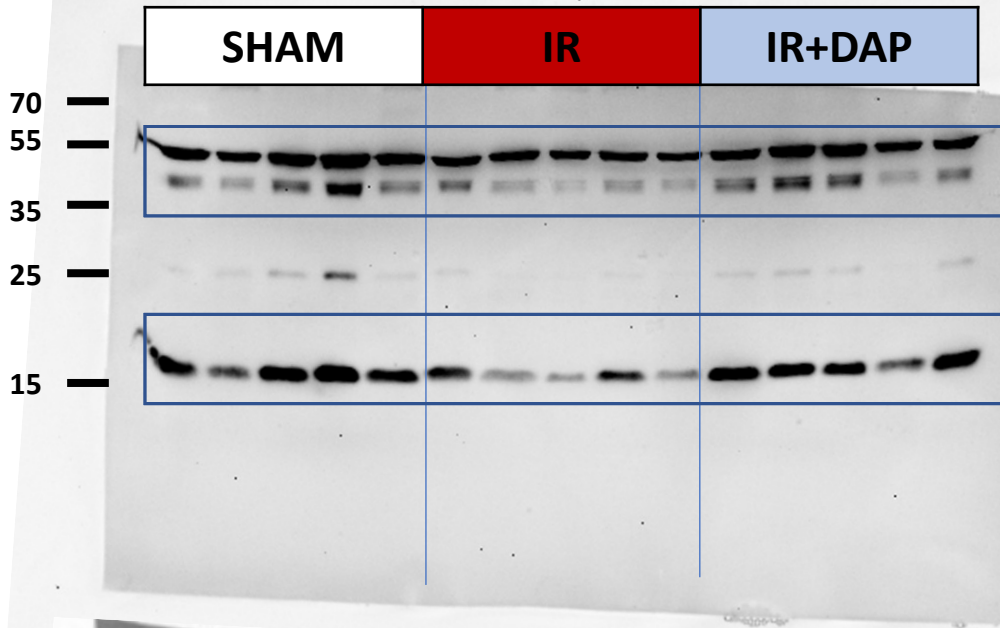

Full unedited gel for Figure 5 and 8: OXPHOS IV Y II

20 ug of kidney cortex isolated mitochondria

Primary Mouse Anti-OXPHOS ab110413 : 1:20,000

Anti-Mouse ab6789 1:40,000 Exp 1 min

5 days after AKI

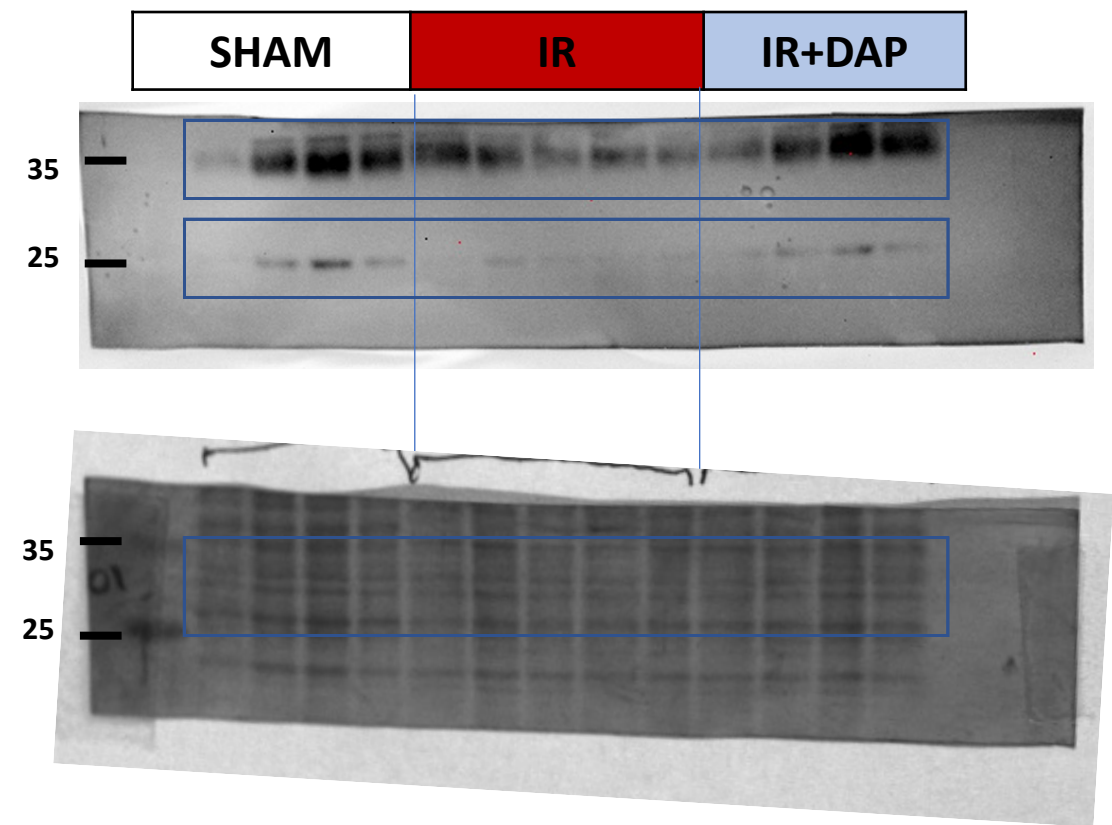

10 days after AKI

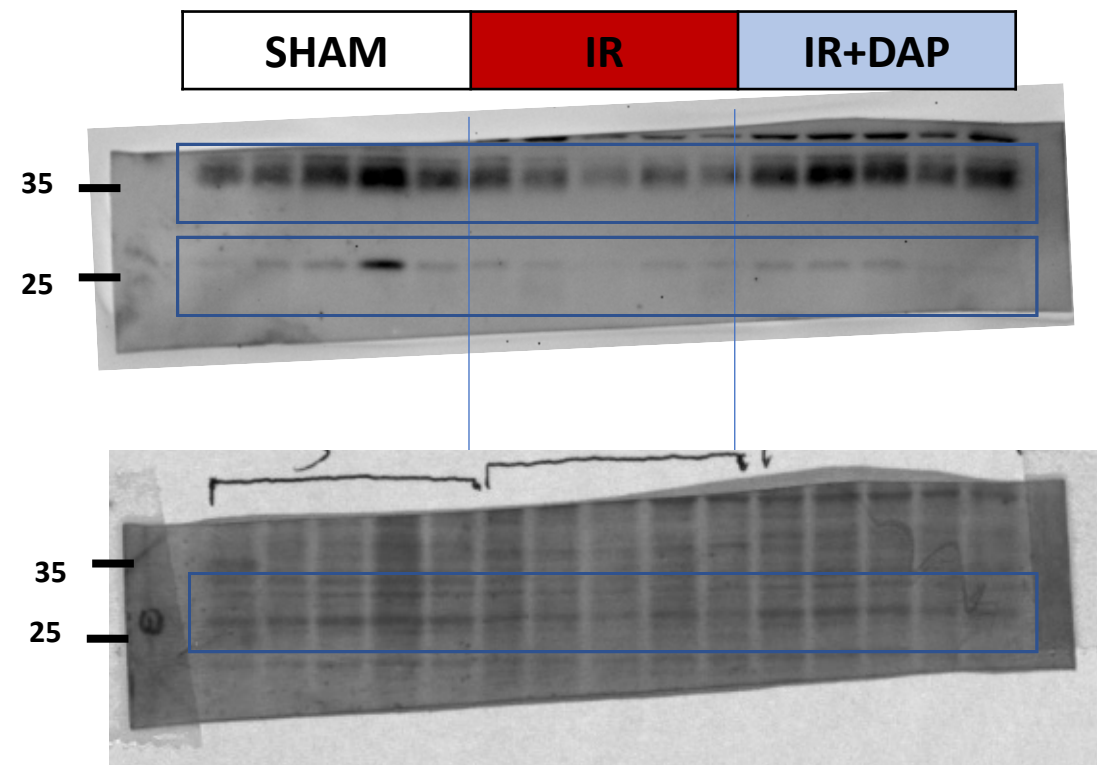

Full unedited gel for Figure 6 and 8: Bcl2  
60 ug of kidney cortex isolated mitochondria

Primary Rabbit Anti-Bcl2 SAB5701336: 1:500  
Anti-Rabbit A0545 1:7,500 Exp 1 min

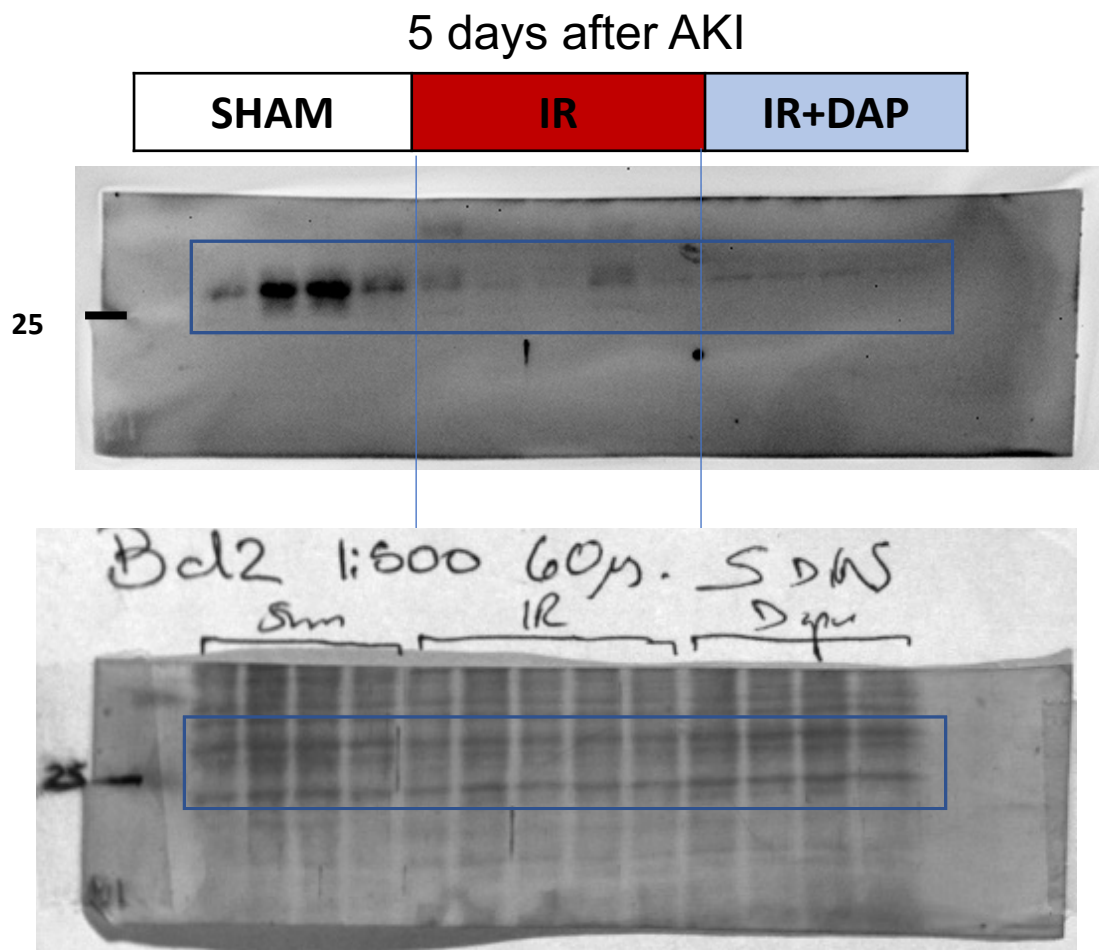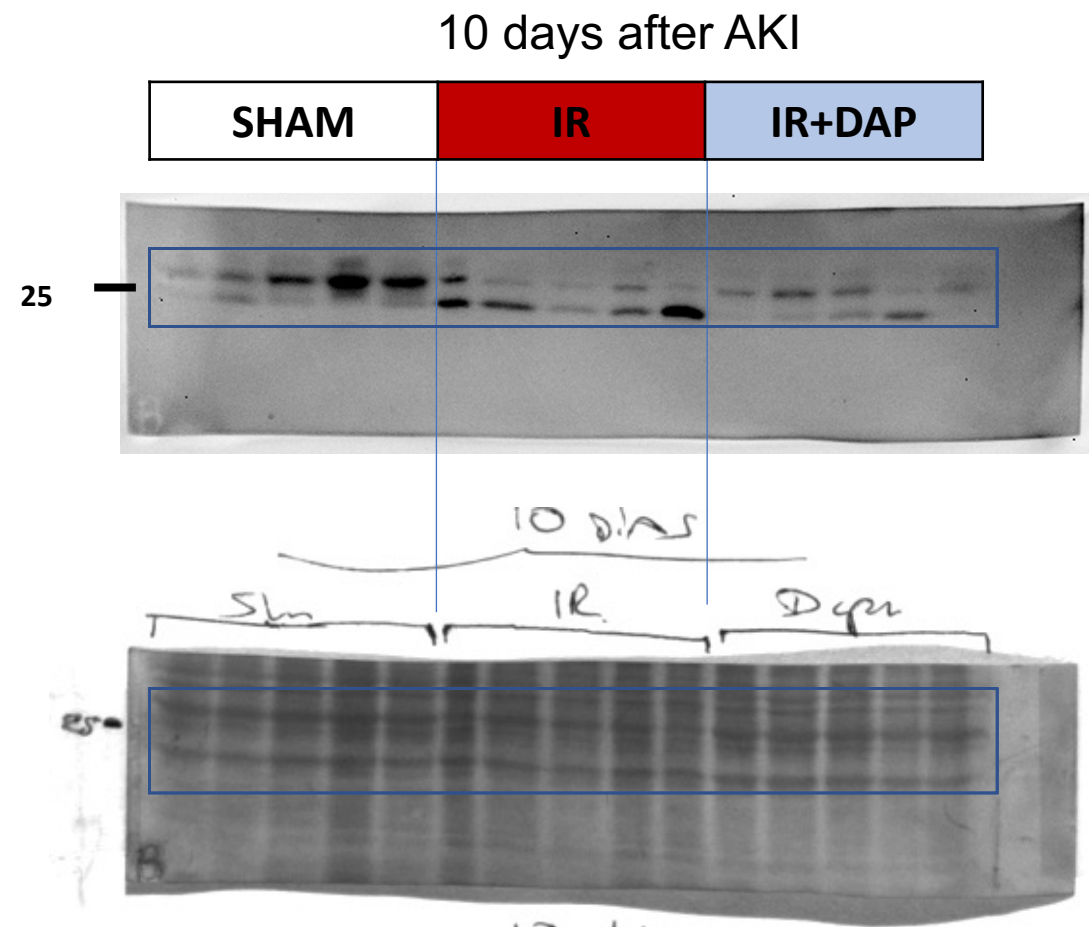

Full unedited gel for Figure 6 and 8: BAX  
20 ug of kidney cortex isolated mitochondria  
Primary Rabbit Anti-Bax SAB5701333 : 1:2500  
Anti-Rabbit A0545 1:10,000 Exp 30 seg

5 days after AKI

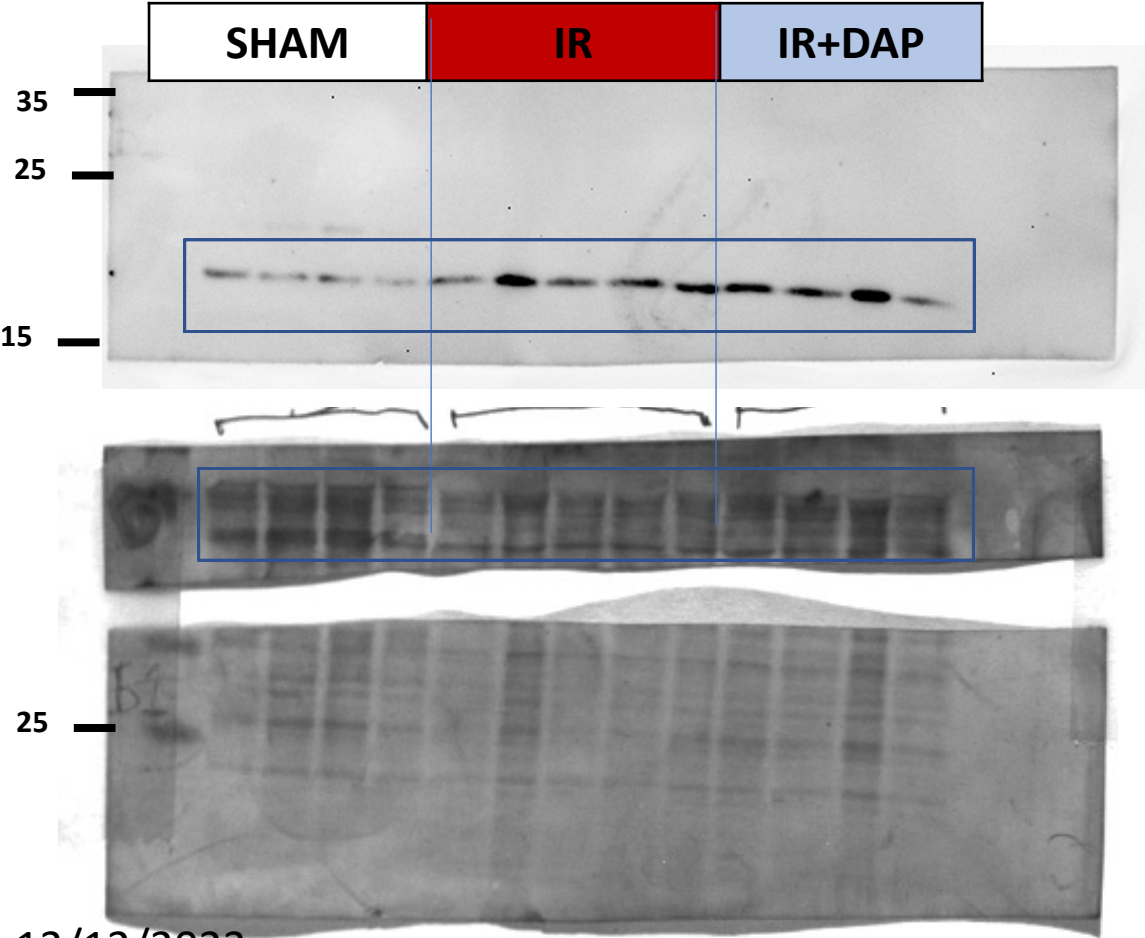

13/12/2023

10 days after AKI

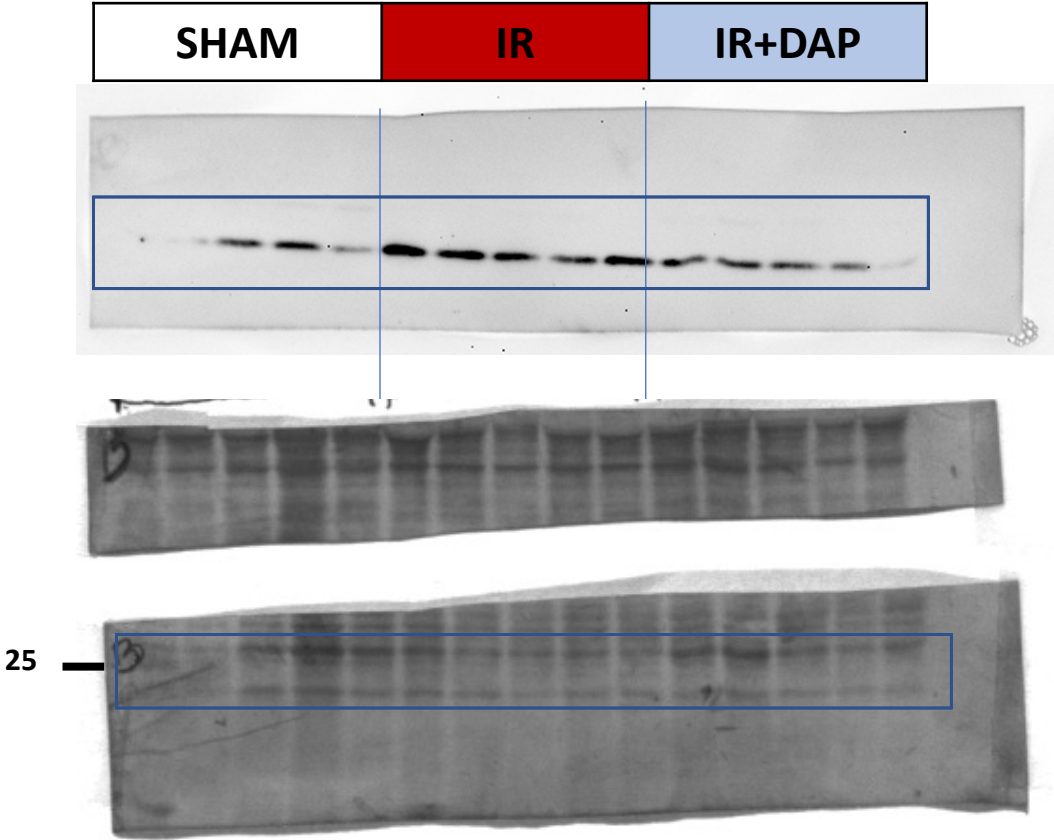



Full unedited gel for Figure 6 and 8: Bnip3  
60 ug of kidney cortex isolated mitochondria

Primary Mouse Anti-Bnip3 sc-56167 1:500  
Anti-Mouse ab6789 1:40,000 Exp 1 min

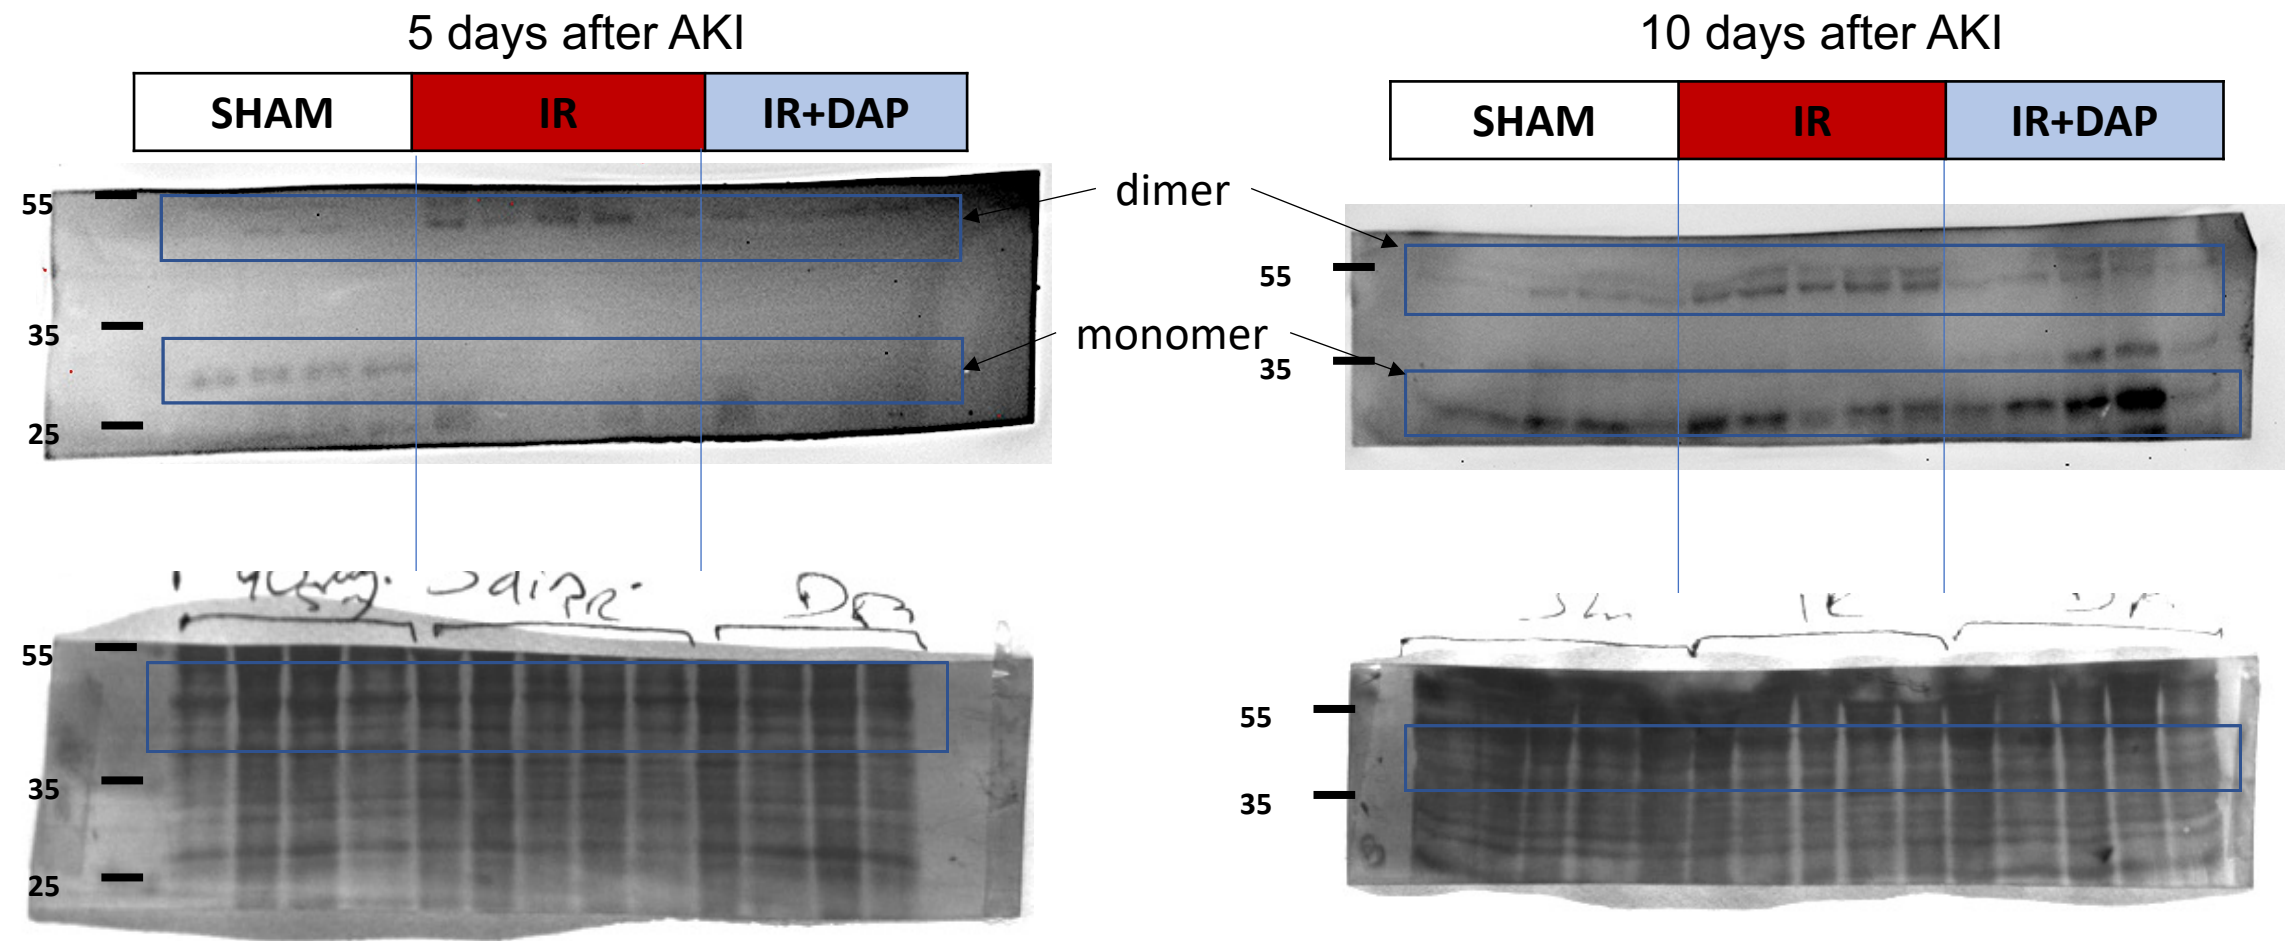



Full unedited gel for Figure 6 and 8: NLRP3  
20 ug of kidney cortex mitochondria

Primary Rabbit Anti-NLRP3 15101S 1:2000  
Anti-Rabbit 211-032-171 1:15,000 Exp 1 min

5 days after AKI

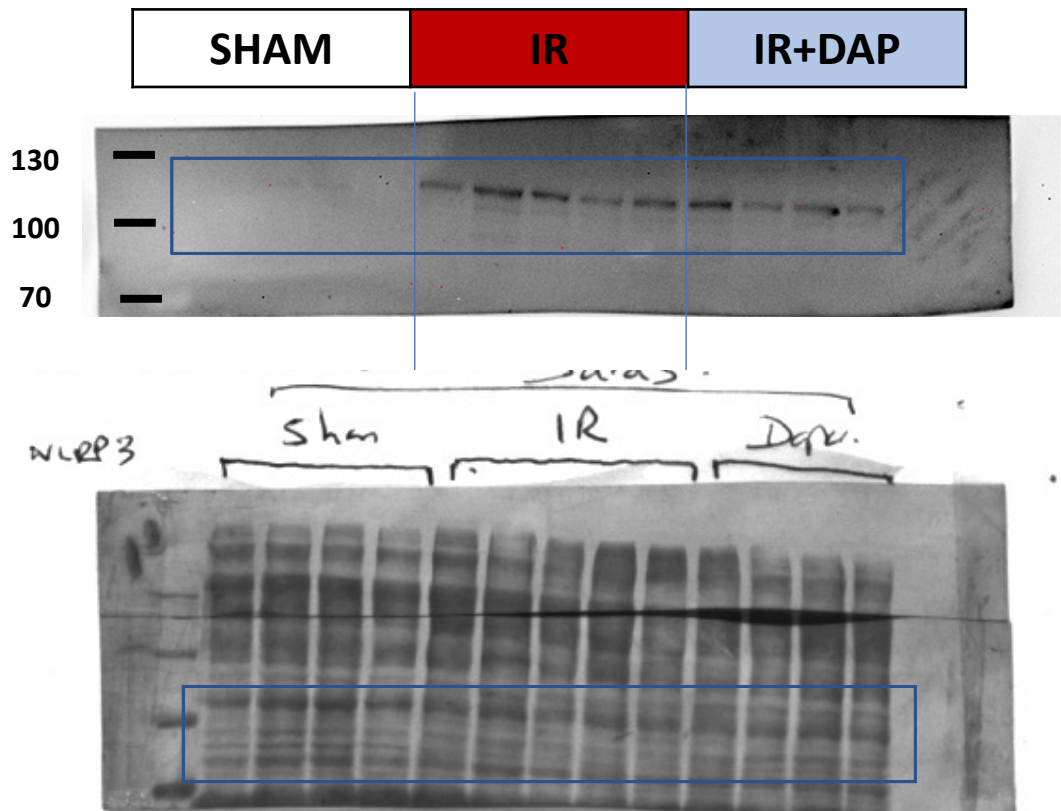

10 days after AKI

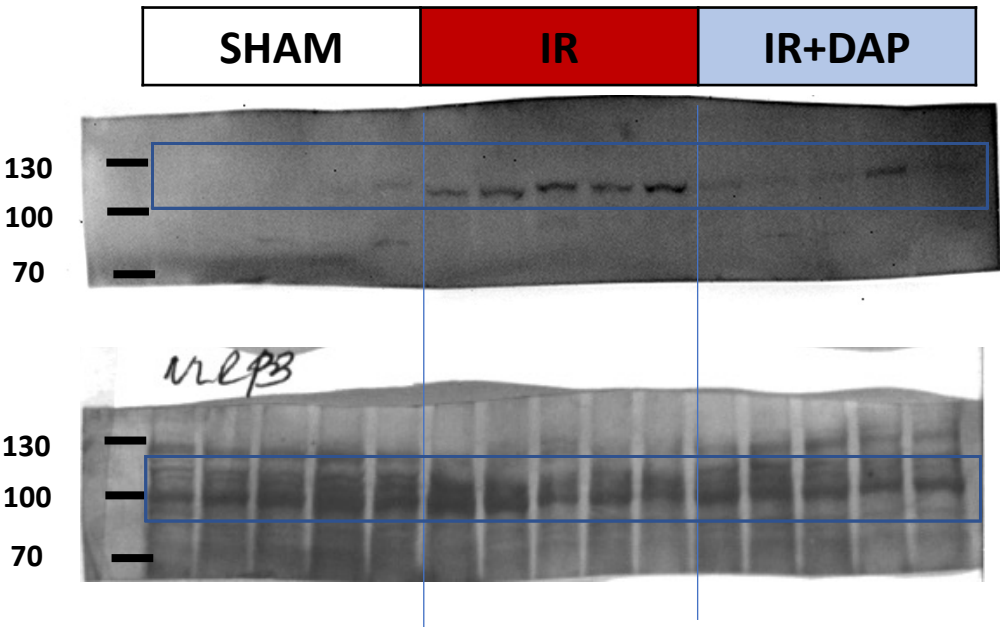

Supplement: sd2 [file 2]
